# Supplementary material
Source: ML conference proceedings conference paper supplement (https://proceedings.neurips.cc/paper_files/paper/2012/hash/af4732711661056eadbf798ba191272a-Abstract.html)
Supplement: Supplementary file [file af4732711661056eadbf798ba191272a-Supplemental.zip]

---

## A nonparametric variable clustering model: supplementary material

---

Here we present the update equations for the DPVC Gibbs sampler.

**Sampling the factor loading matrix  $\mathbf{G}$ .**

$$g_{dk} | \mathbf{Y}, \mathbf{G}_{-dk}, \mathbf{C}, \mathbf{X}, \sigma_g, \sigma_x, \sigma_d, \alpha \sim \mathcal{N}(\mu_g^*, \lambda_g^{-1}) \quad (1)$$

where

$$\lambda_g, \mu_g^* = \begin{cases} \sigma_g^2, \mu_g & \text{if } c_{dk} = 0 \\ \frac{\sum_n x_{kn}^2}{\sigma_d^2} + \frac{1}{\sigma_g^2}, \lambda_g^{-1} \left( \frac{1}{\sigma_d^2} \mathbf{Y}_{d:} \mathbf{X}_{k:}^\top + \frac{1}{\sigma_g^2} \mu_g \right) & \text{if } c_{dk} = 1 \end{cases} \quad (2)$$

**Sampling the latent factor matrix  $\mathbf{X}$ .**

$$\mathbf{X}_{:n} | \mathbf{Y}, \mathbf{X}_{-:n}, \mathbf{G}, \mathbf{C}, \sigma_g, \sigma_x, \sigma_d, \alpha \sim \mathcal{N}(\boldsymbol{\mu}_{\mathbf{X}_{:n}}, \boldsymbol{\Lambda}_{\mathbf{X}_{:n}}^{-1}) \quad (3)$$

where

$$\begin{aligned} \boldsymbol{\Lambda}_{\mathbf{X}_{:n}} &= (\mathbf{G} \cdot \mathbf{C})^\top \boldsymbol{\Sigma}_y^{-1} (\mathbf{G} \cdot \mathbf{C}) + \boldsymbol{\Sigma}_x^{-1} \\ \boldsymbol{\mu}_{\mathbf{X}_{:n}} &= \boldsymbol{\Lambda}_{\mathbf{X}_{:n}}^{-1} (\mathbf{G} \cdot \mathbf{C})^\top \boldsymbol{\Sigma}_y^{-1} \mathbf{Y}_{:n} \end{aligned}$$

**Cluster assignments  $\mathbf{c}$ .** When sampling the cluster assignments,  $\mathbf{c}$  we found it beneficial to integrate out  $\mathbf{g}$ , while instantiating  $\mathbf{X}$ . We require

$$\begin{aligned} P(c_d = k | y_{d:}, x_{k:}, \sigma_g) &= \int P(y_{d:} | x_{k:}, g_d) p(g_d | \sigma_g) dg_d \\ &= \frac{1}{(2\pi\sigma_d^2)^{N/2}} e^{-\frac{y_{d:} y_{d:}^\top}{2\sigma_d^2}} \frac{1}{\lambda_g^{\frac{1}{2}} \sigma_g} e^{\frac{\lambda_g \mu_g^{*2}}{2}} \end{aligned}$$

where  $\lambda_g, \mu_g^*$  are defined in Equation 2.

**Hyperparameters.** We used slice sampling (?) to sample the CRP hyperparameter  $\alpha$ , while the posterior updates of the  $\sigma_g$  and  $\sigma_d$  are as follows:

$$\begin{aligned} \sigma_g^2 | \mathbf{G} &\sim \mathcal{IG} \left( \frac{DK}{2} + 1, \frac{\sum_k \mathbf{g}_{:k}^\top \mathbf{g}_{:k}}{2} + 1 \right) \\ \sigma_d^2 | \mathbf{Y}, \mathbf{G}, \mathbf{C}, \mathbf{X} &\sim \mathcal{IG} \left( \frac{DN + 1}{2}, \frac{\sum_n (\mathbf{Y}_{:n} - \boldsymbol{\mu}_{:n})^2}{2} + 0.1 \right) \end{aligned}$$
